# Supplementary material for: Dimethyl sulfide and its role in aerosol formation and growth in the Arctic summer – a modelling study
Source: Copernicus journal article supplement (doi:10.5194/acp-2019-470), 2019-05-27
Supplement: Supplementary file 1 [file acp-2019-470-supplement.pdf]

*Supplement of*

## **Dimethyl sulfide and its role in aerosol formation and growth in the Arctic summer – a modelling study**

Roghayeh Ghahremaninezhad<sup>1</sup>, Wanmin Gong<sup>1</sup>, Martí Galí<sup>2</sup>, Ann-Lise Norman<sup>3</sup>, Stephen R. Beagley<sup>1</sup>, Ayodeji Akingunola<sup>1</sup>, Qiong Zheng<sup>1</sup>, Alexandru Lupu<sup>1</sup>, Martine Lizotte<sup>2</sup>, Maurice Levasseur<sup>2</sup>, W. Richard Leitch<sup>1</sup>.

<sup>1</sup>Environment and Climate Change Canada, Toronto, Ontario, Canada

<sup>2</sup>Québec-Océan, Department of Biology, Université Laval, Québec, Canada

<sup>3</sup>Department of Physics and Astronomy, University of Calgary, Calgary, Canada

*Correspondence to:* Wanmin Gong (wanmin.gong@canada.ca)

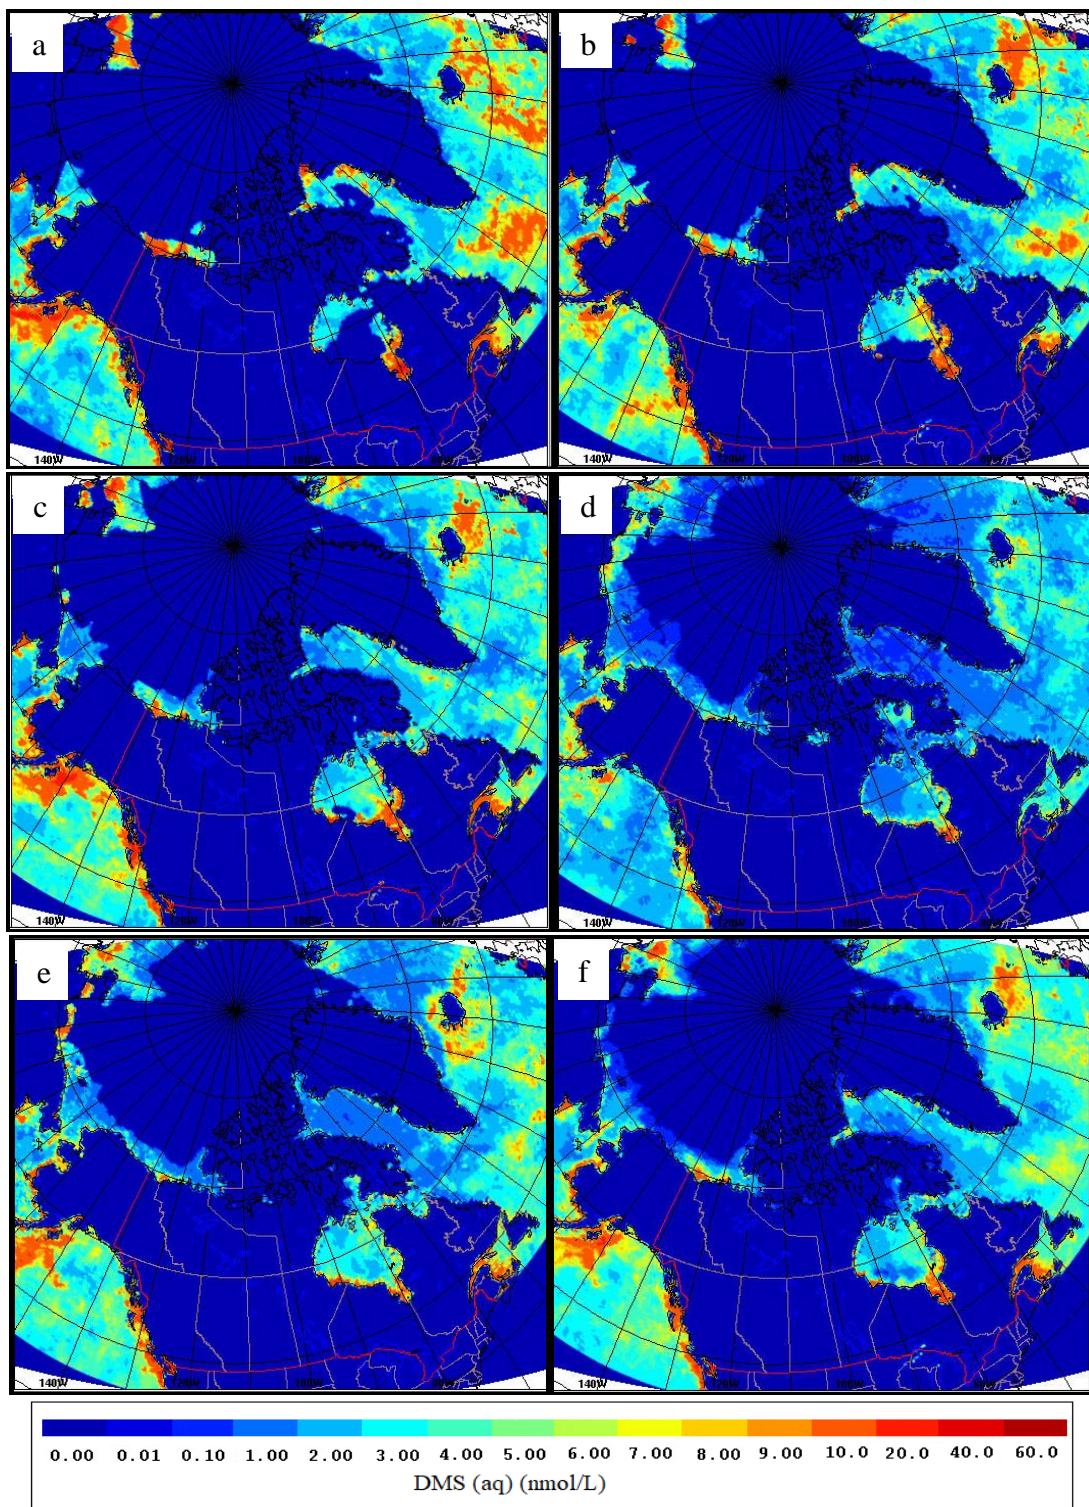

Figure S1: SAT DMS(aq) (nmol/L) for a. July 1<sup>st</sup> to 3<sup>rd</sup>, b. July 4<sup>th</sup> to 11<sup>th</sup>, c. July 12<sup>th</sup> to 19<sup>th</sup>, d. July 20<sup>th</sup> to July 27<sup>th</sup>, e. July 28<sup>th</sup> to August 4<sup>st</sup>, and f. August 5<sup>th</sup> to 8<sup>th</sup>, 2014.

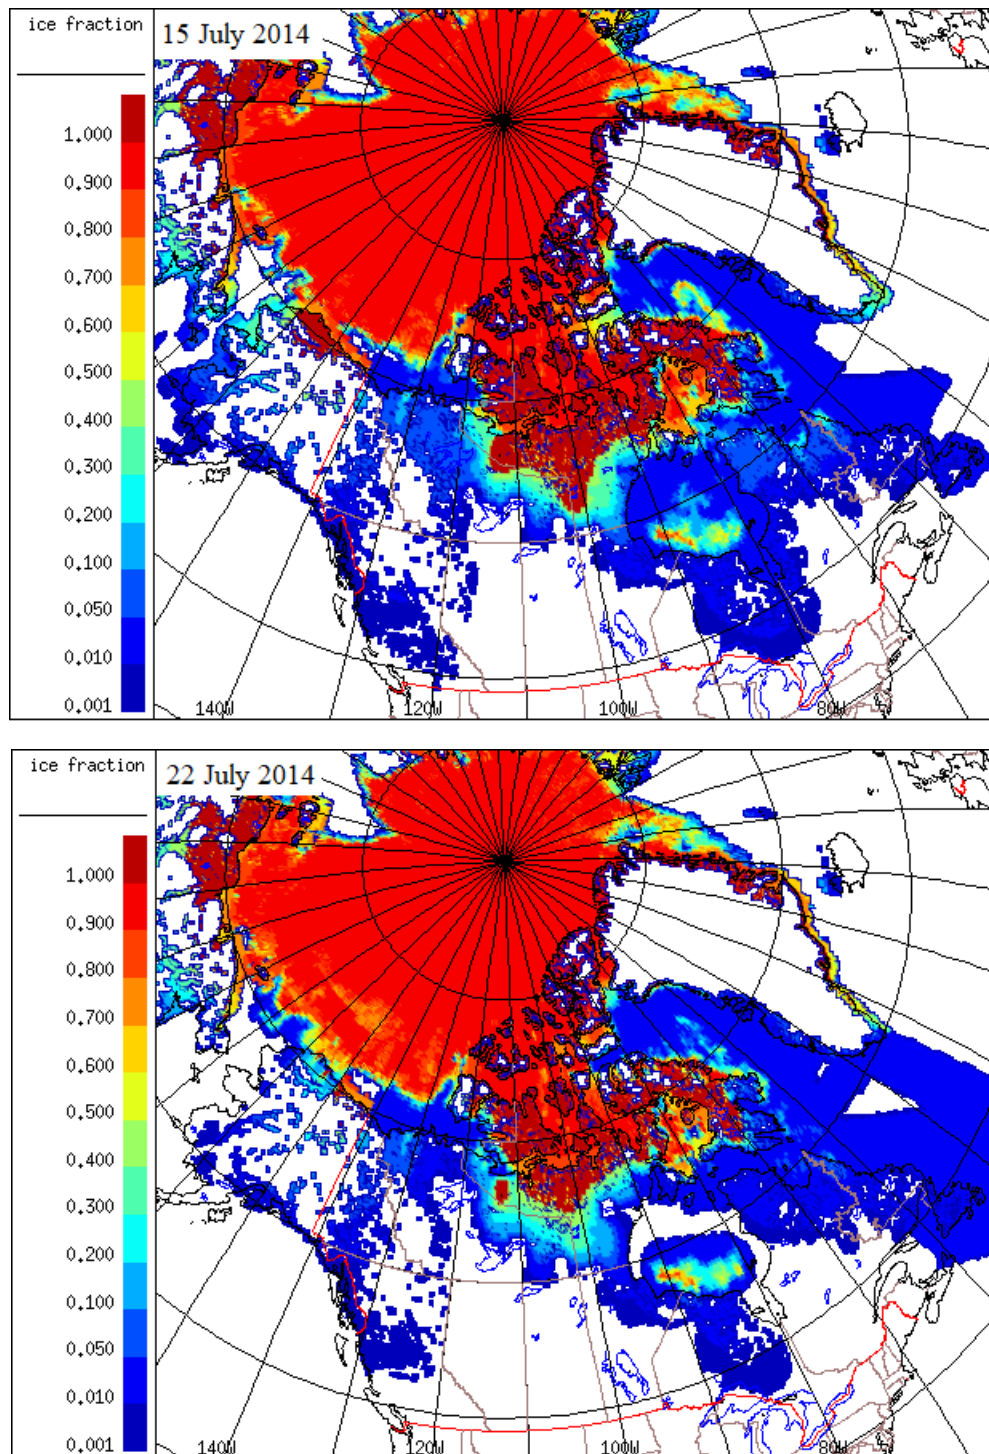

Figure S2: Ice fraction for July 15<sup>th</sup> (upper panel) and July 22<sup>nd</sup> (lower panel), 2014.
